# Supplementary material for: Study on the formation of magnetic nanoclusters and change in spin ordering in Co-doped ZnO using magnetic susceptibility
Source: Royal Society of Chemistry journal article supplement (doi:10.1039/c5ra13194d), 2015-01-01
Supplement: c5ra13194d1.pdf [file c5ra13194d1.pdf]

## Supporting Information

### Study on formation of magnetic nanoclusters and change in spin ordering in Co-doped ZnO using magnetic susceptibility

Seunghun Lee<sup>a</sup>, Bum-Su Kim<sup>b</sup>, Ji Hun Park<sup>b</sup>, Tae-Woo Lee<sup>c</sup>, Yong Chan Cho<sup>d</sup>, and Se-Young Jeong<sup>b\*</sup>

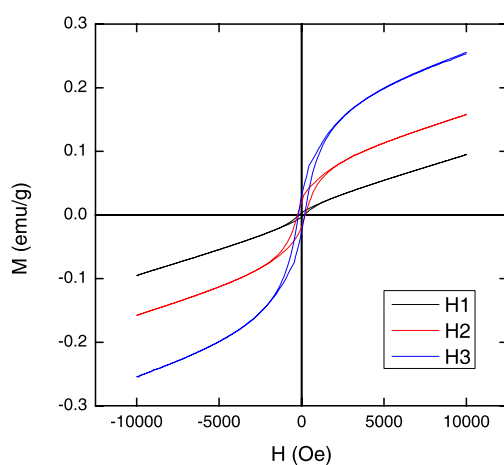

Figure S1. Field-dependent magnetization for ZnCoO (Z8) samples measured at 300 K, as a function of the number of hydrogen treatment cycles.
